# Supplementary material for: Coupling of the water-splitting mechanism and doping-mixture method to design a novel Cr-perovskite for rapid and efficient solar thermochemical H2 production
Source: Royal Society of Chemistry journal article supplement (doi:10.1039/d2qi01235a), 2022-01-01
Supplement: d2qi01235a1.pdf [file d2qi01235a1.pdf]

## Supporting Information

### Coupling of water-splitting mechanism and doping-mixture to design a novel Cr-perovskite for rapid and efficient solar thermochemical H<sub>2</sub> production

Jian Cong,<sup>a,b</sup> Tianzeng Ma,<sup>a,b</sup> Zheshao Chang,<sup>a</sup> Jasurjon S. Akhatov,<sup>c</sup> Mingkai Fu,<sup>a,\*</sup> Xin Li<sup>a, b,\*</sup>

<sup>a</sup> Institute of Electrical Engineering, Chinese Academy of Sciences, 100190, Beijing, China

<sup>b</sup> University of Chinese Academic of Sciences, 100049, Beijing, China

<sup>c</sup> Physical-Technical Institute, SPA “Physics-Sun”, Tashkent, 100084, Uzbekistan

\*Corresponding authors. E-mail addresses: fumingkai@mail.iee.ac.cn, drlixin@mail.iee.ac.cn

#### Experimental Section

The experimental setup of the thermochemical reaction is shown in the Fig. S1. In the redox process, the main equipment includes a tubular furnace with a corundum reaction chamber, a syringe pump to inject water, a steam generator to evaporate the injected water, and a gas chromatograph to analyze the concentration of H<sub>2</sub> and O<sub>2</sub>. The experimental setting parameters of equipment are listed in the Table 1.

**Table S1.** Experimental details

| Equipment                    | Setting Parameters                                        |
|------------------------------|-----------------------------------------------------------|
| Tubular furnace (SK-G05163)  | Heating rate: 10 °C/min, $T = 0 \sim 1600$ °C             |
| Syringe pump                 | water injection velocity: $0 \sim 1$ ml min <sup>-1</sup> |
| Steam generator (FD-HG)      | Evaporation temperature: 100 ~ 150 °C                     |
| Gas chromatograph (GC-2014C) | Tracer gas: H <sub>2</sub> , O <sub>2</sub>               |

There are three parts of experimental system. The first part is the gas pipeline, with heat tracing device (130 °C), to deliver the inert gas (argon) and water vapor into the reaction chamber. The carriers of analyzing O<sub>2</sub> and H<sub>2</sub> is Argon gas. In the reduction process, argon with the rate of 200 ml min<sup>-1</sup> flows into reaction chamber to provide an inert environment, and in the oxidation process, the mixing gas (vapor-argon) flows into the chamber to react with the sample powder hold in a corundum crucible. The water injection rate is controlled at 0.5 ml min<sup>-1</sup>. This part of the system is the reaction region. After the redox reaction, the produced gas flows through a gas-liquid separator to remove water vapor and then the produced H<sub>2</sub> is analyzed by the gas chromatograph.

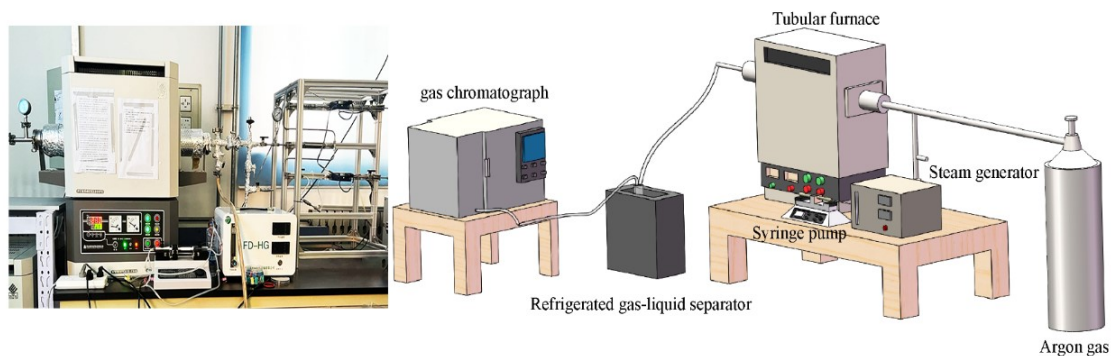

**Fig. S1** Experimental setup of the redox reaction and gas detection process.

### XRD result

Fig. S2 shows the XRD results of  $\text{CeO}_2$  before and after the thermochemical  $\text{H}_2$  production cycles.  $\text{CeO}_2$  remains the stable lattice structure after experiments. A good fit of the synthesized materials with the PDF graph of  $\text{CeO}_2$  (PDF #81-0792) has been obtained in this part.

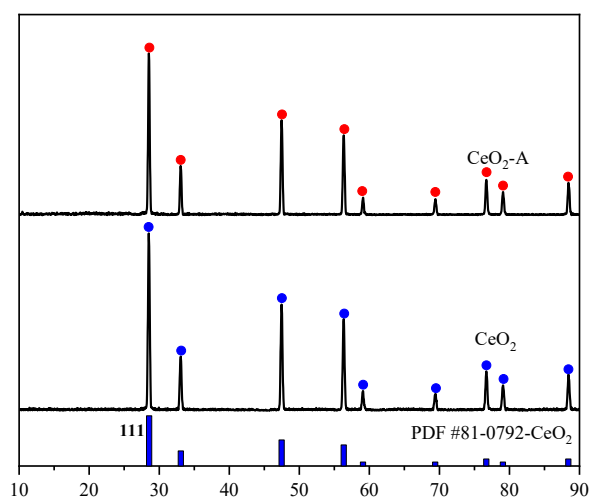

**Fig. S2** XRD patterns of the ready-made Ceria (A indicates the results after experiments)

As shown in Fig. S3, the Bragg peaks of  $\text{CeO}_2$  appear in the XRD graph of  $\text{YCr}_{0.75}\text{Zr}_{0.25}\text{O}_3$ -25wt%  $\text{CeO}_2$  after experiments. The mixing of  $\text{CeO}_2$  causes the downshift of the main peak (111) because of the large ionic radius of  $\text{Ce}^{4+}$  (0.87 Å). The calculated lattice structures and parameters are listed in Table S2.

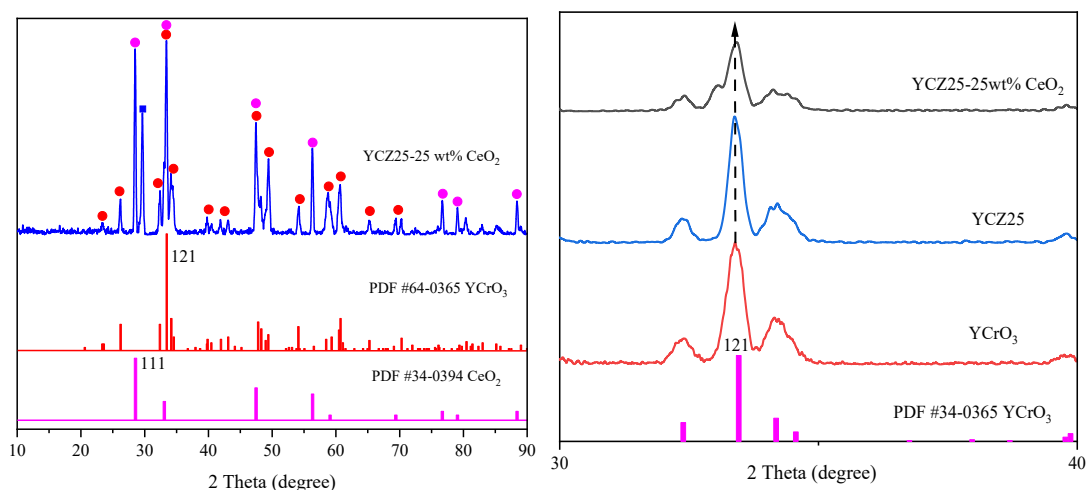

**Fig. S3** XRD patterns of the mixed  $\text{YCr}_{0.75}\text{Zr}_{0.25}\text{O}_3\text{-25wt\% CeO}_2$  after experimental process.

**Table S2.** XRD calculation results of  $\text{YCr}_{0.75}\text{Zr}_{0.25}\text{O}_3\text{-25wt\% CeO}_2$

| Samples                     | Lattice constants and angles                                                                         | Crystalline size(nm) | d (1 2 1) (Å) |
|-----------------------------|------------------------------------------------------------------------------------------------------|----------------------|---------------|
| $\text{YCZ25-25wt\% CeO}_2$ | $a=5.517 \text{ \AA}$ , $b=7.54 \text{ \AA}$ , $c=5.26 \text{ \AA}$ , $\alpha=\beta=\gamma=90^\circ$ | 28.0                 | 2.681         |

### SEM result

Fig. S4 shows the SEM graphs of  $\text{YCr}_{0.75}\text{Zr}_{0.25}\text{O}_3\text{-25 wt\% CeO}_2$  after the thermochemical reactions, which shows a multi-porous structure..

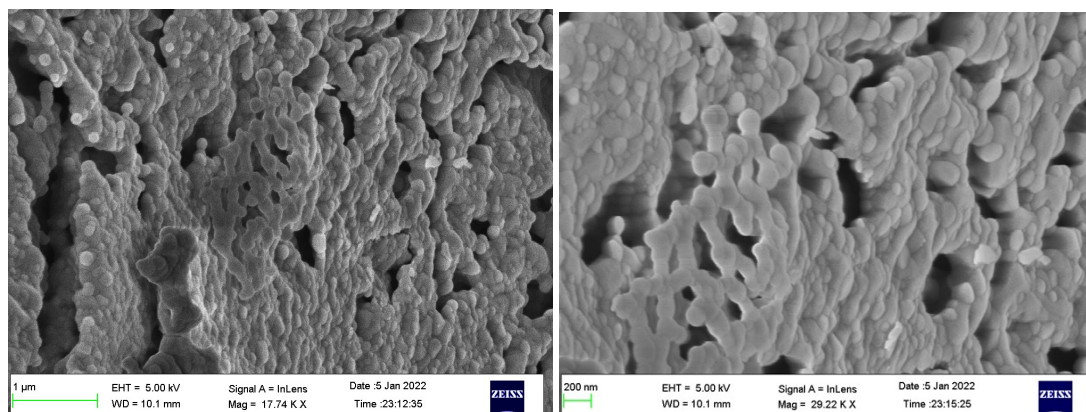

**Fig. S4** SEM graphs of  $\text{YCr}_{0.75}\text{Zr}_{0.25}\text{O}_3\text{-25 wt\% CeO}_2$

### EDX result

Fig. S5 indicates the EDX result of elemental composition of the synthesized material  $\text{YCr}_{0.75}\text{Zr}_{0.25}\text{O}_3$ .

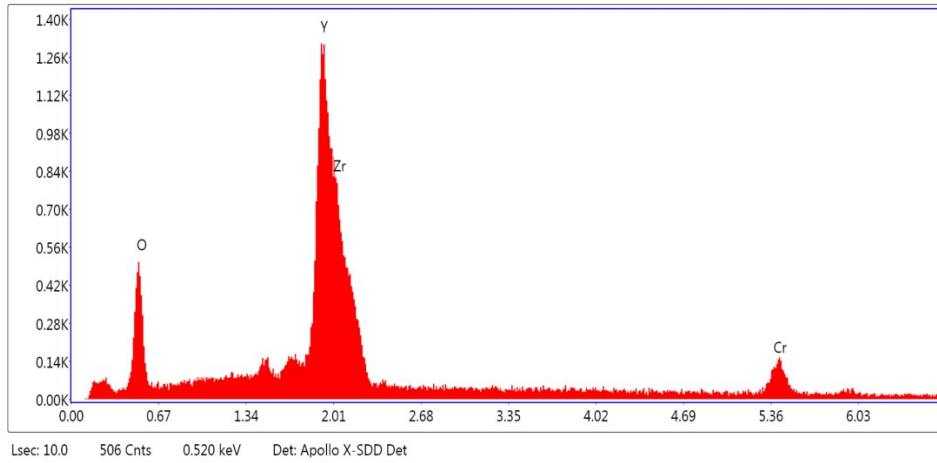

**Fig. S5** EDX mapping of the Y, Cr and Zr distribution in the  $\text{YCr}_{0.75}\text{Zr}_{0.25}\text{O}_{3-\delta}$  sample

### Zr doping ratio

Fig. S6 shows the  $\text{H}_2$  production capacity under different Zr doping ratios (10, 25, 40 mol%).

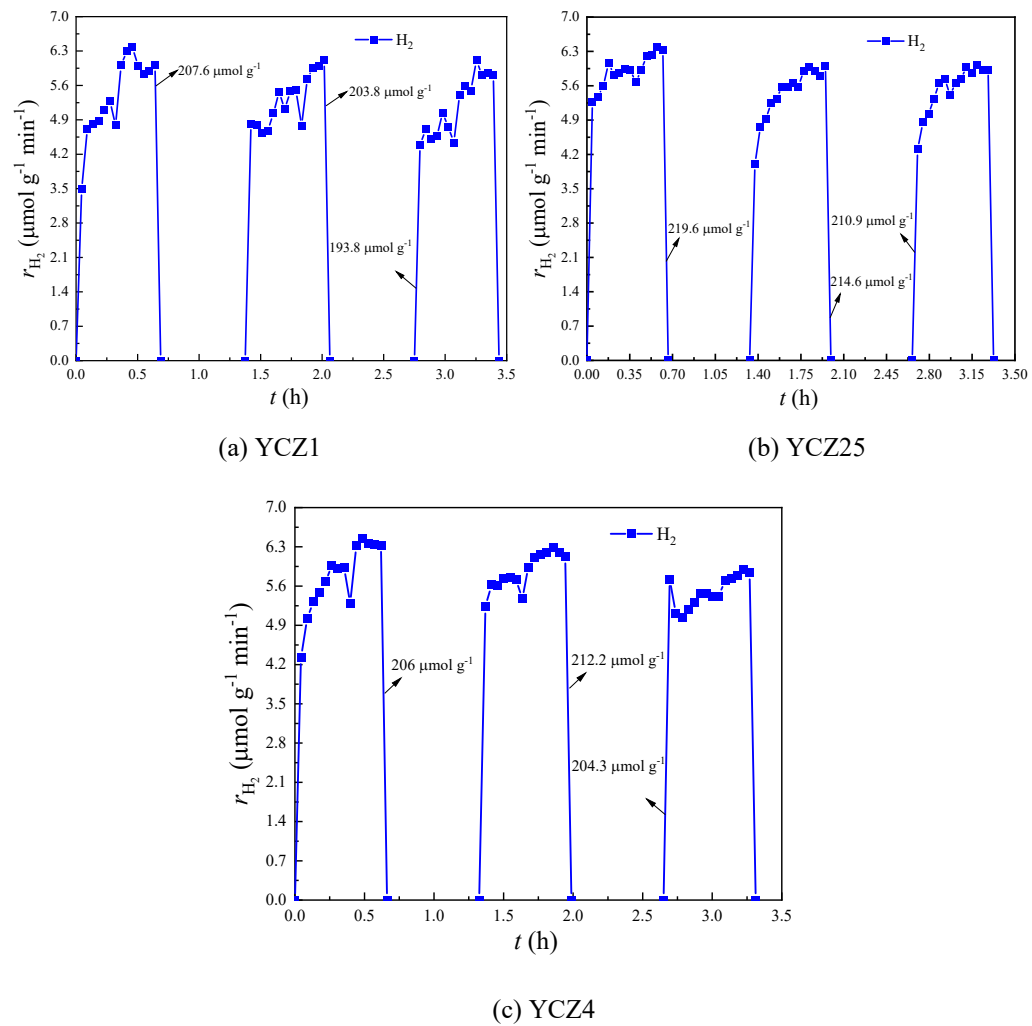

**Fig. S6** The  $\text{H}_2$  rate under different Zr doping ratios (10, 25, 40 mol%). Materials were reduced at 1400

°C (heated at 10 °C/min) and oxidized at 1300 °C (cooled at 30 °C/min) in the 40 min water-splitting process

### The comparison of H<sub>2</sub> yield of three Zr doping ratios

To determine the optimum doping ratio of Zr, the STWS performance of three Zr doping ratios (10, 25, 40 mol%) are compared in the Fig. S7. Based on the comparison results of different Zr doping ratios, the doping of Zr at 25 mol% presents the favorable H<sub>2</sub> yield ( $Y_{H_2}=219.6 \mu\text{mol g}^{-1}$ ). On the whole, H<sub>2</sub> yield of multiple cycles under the three Zr doping ratios show a gradual decrease trend except a slight increase of YCZ4, which may be caused by the remove of impurities contained in the parent and the release of excess oxygen have limited H<sub>2</sub> production ability of the first STWS cycle. By comparing H<sub>2</sub> yield loss of different Zr doping ratios, YCZ1 shows the most considerable decrease of H<sub>2</sub> production capacity and YCZ25 has the lowest rate of decline. As for the whole H<sub>2</sub> production performance of the three cycles, the  $Y_{H_2}$  of YCZ25 is higher than the value of YCZ1 and YCZ4. From the above analysis, the setting of Zr doping ratio at 25 mol% can achieve the favorable performance of H<sub>2</sub> production.

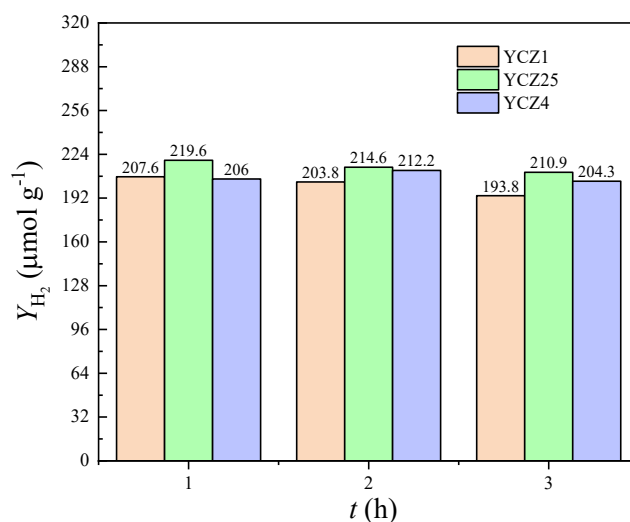

**Fig. S7** The H<sub>2</sub> yield per mass and rate per minute of YCZ1, YCZ25 and YCZ4. Materials were reduced at 1400 °C (heated at 10 °C/min) and oxidized at 1300 °C (cooled at 30 °C/min) in the 40 min water-splitting process

### Ceria mixing ratio

After the determination of Zr doping ratio, we try to mix ceria in 25 mol% Zr doped YCrO<sub>3</sub>

materials to improve the water-splitting kinetic performance. Fig. S8 shows the H<sub>2</sub> production performance of three STWS cycles under different ceria mixing ratios. The ceria mixing ratio of 25 wt% shows a favorable H<sub>2</sub> production performance compared with the ceria ratio of 10 wt% and 50 wt%.

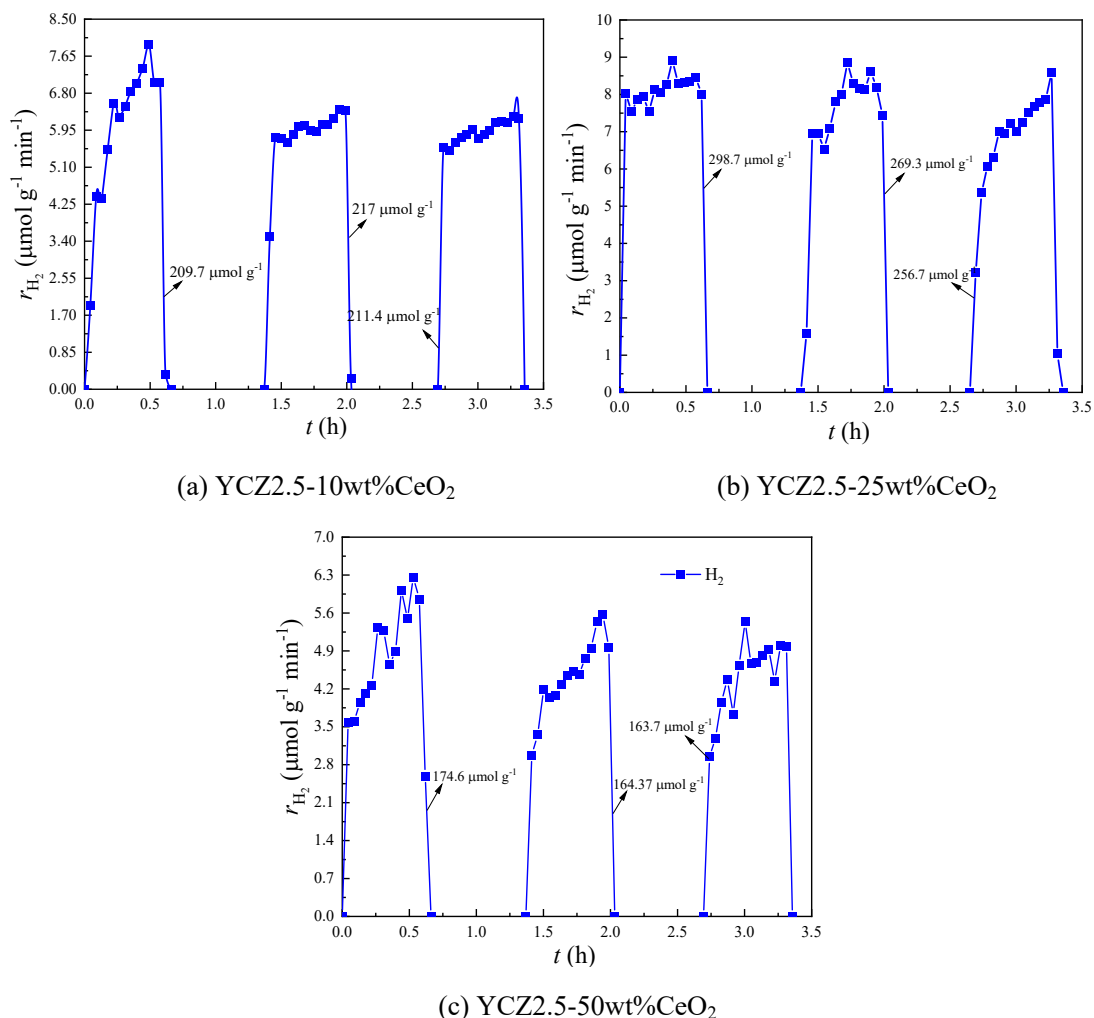

**Fig. S8** Hydrogen production under different ceria mixing ratios (10, 25, 50 wt% CeO<sub>2</sub>). Materials were reduced at 1400 °C (heated at 10 °C/min) and oxidized at 1300 °C (cooled at 30 °C/min) in the 40 min water-splitting process

### The comparison of H<sub>2</sub> yields of three ceria mixing ratios

The comparison of H<sub>2</sub> yield of three ceria mixing conditions (10, 25 and 50 wt%) are shown in the Fig. S9. In the multiple cycles, the H<sub>2</sub> yields of mixture materials indicated a slight decrease trend, the maximum variation of H<sub>2</sub> yields was 9.8% and the minimum change was 0.4%. In the STWS cycles, the ceria mixture ratio of 25 wt% performs the optimum performance, and the average

H<sub>2</sub> yield of this condition is 274.9 μmol g<sup>-1</sup>. The average H<sub>2</sub> yields of YCZ25-10wt%CeO<sub>2</sub> and YCZ25-50wt%CeO<sub>2</sub> are 22.7% and 39.1% lower than YCZ25-25wt%CeO<sub>2</sub>. From the above analysis, the suitable ceria mixing ratio can stimulate water splitting in the STWS process and the excess of ceria influences the H<sub>2</sub> yields because of the weakness of reduction capacity. On the basis of the determined Zr doping ratio, ceria mixing ratio at 25% can further lead to 27.8% increase of H<sub>2</sub> yield.

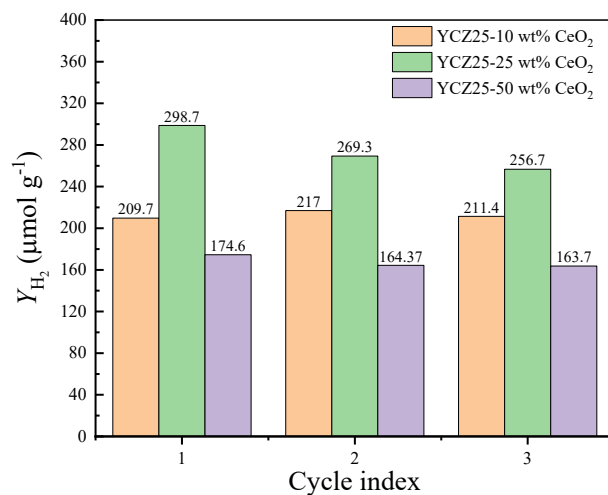

**Fig. S9** The H<sub>2</sub> yield of YCZ25-10 wt%CeO<sub>2</sub>, YCZ25-25wt%CeO<sub>2</sub> and YCZ25-50wt%CeO<sub>2</sub>. Materials were reduced at 1400 °C (heated at 10 °C/min) and oxidized at 1300 °C (cooled at 30 °C/min) in the 40 min water-splitting process
